# Supplementary material for: Maternal and fetal risks of planned vaginal breech delivery vs planned caesarean section for term breech birth: A systematic review and meta-analysis
Source: PubMed Central journal article supplement (PMC9284475; doi:10.7189/jogh.12.04055), 2022-07-16
Supplement: jogh-12-04055-s001.pdf [file jogh-12-04055-s001.pdf]

**Table S1.** Search strategies.

| Databases      | Search date | Search strategy                                                                                                        | Number of results | Selected results |
|----------------|-------------|------------------------------------------------------------------------------------------------------------------------|-------------------|------------------|
| Cochrane       | 10/09/2020  | #1 (Breech presentation) (word variations have been searched)                                                          | 199               | 2                |
|                |             | #2 (Breech Birth) (word variations have been searched)                                                                 | 128               | 1                |
|                |             | #3 (Breech Delivery) (word variations have been searched)                                                              | 199               | 1                |
| Medline        | 11/09/2020  | Breech [Mesh] AND presentation [Mesh].                                                                                 | 1125              | 20               |
|                |             | Breech [Mesh] AND birth[Mesh]                                                                                          | 757               | 24               |
|                |             | Breech [Mesh] AND delivery [Mesh]                                                                                      | 1107              | 8                |
| Scopus         | 15/09/2020  | ("breech" AND "presentation")                                                                                          | 2175              | 16               |
|                |             | ("breech" AND "birth")                                                                                                 | 1257              | 12               |
|                |             | ("breech" AND "delivery")                                                                                              | 1575              | 8                |
| Embase         | 17/09/2020  | ('breech presentation'/exp OR 'breech presentation') AND ('birth'/exp OR birth)                                        | 2313              | 28               |
|                |             | ('breech presentation'/exp OR 'breech presentation') AND ('obstetric delivery'/exp OR 'obstetric delivery')            | 4196              | 20               |
| Web of Science | 20/09/2020  | #1 TEMA: (breech presentation) Bases de datos= WOS, CCC, DIIDW, KJD, MEDLINE, RSCI, SCIELO Período de tiempo=2010-2020 | 1531              | 7                |
|                |             | #2 TEMA: (breech birth) Bases de datos= WOS, CCC, DIIDW, KJD, MEDLINE, RSCI, SCIELO Período de tiempo=2010-2020        | 1103              | 5                |
|                |             | #3 TEMA: (breech delivery) Bases de datos= WOS, CCC, DIIDW, KJD, MEDLINE, RSCI, SCIELO Período de tiempo=2010-2020     | 1379              | 6                |
| Cuiden         | 21/09/2020  | ("breech")AND("presentation")                                                                                          | 13                | 0                |
|                |             | ("breech")AND("birth")                                                                                                 | 3                 |                  |
|                |             | ("breech")AND("delivery")                                                                                              | 5                 | 0                |
| TOTAL          |             |                                                                                                                        | 19065             | 158              |

**Table S2.** Sensitivity analysis of perinatal mortality, perinatal trauma Apgar score at 5 min and admittance to neonatal ICU.

| <b>Sensitivity analysis of perinatal mortality</b>       |      |       |        |          |          |
|----------------------------------------------------------|------|-------|--------|----------|----------|
| Study                                                    | Year | N     | RR     | CI 95%   |          |
|                                                          |      |       |        | Inferior | Superior |
| Babovic et al [20]                                       | 2010 | 93540 | 3.2833 | 1.9285   | 5.5897   |
| Tharin et al [21]                                        | 2011 | 72140 | 2.6862 | 1.6265   | 4.4363   |
| Singh et al [22]                                         | 2012 | 93832 | 2.8170 | 1.6748   | 4.7381   |
| Toivonen et al [23]                                      | 2012 | 93190 | 3.1572 | 1.8264   | 5.4576   |
| Vistad et al [24]                                        | 2013 | 93373 | 3.2261 | 1.8763   | 5.5472   |
| Vlemmix et al [9]                                        | 2014 | 35622 | 2.6615 | 1.7052   | 4.1538   |
| Foster et al [25]                                        | 2014 | 93175 | 3.1475 | 1.8202   | 5.4427   |
| Bavovic et al [26]                                       | 2016 | 93795 | 3.2213 | 1.8721   | 5.5429   |
| Bin et al [27]                                           | 2016 | 89106 | 3.2355 | 1.6652   | 6.2868   |
| Högberg et al [28]                                       | 2016 | 92288 | 3.0951 | 1.6108   | 5.9471   |
| Abdessalami et al [29]                                   | 2017 | 93634 | 3.1776 | 1.8400   | 5.4877   |
| Fonseca et al [30]                                       | 2017 | 92614 | 2.9254 | 1.7252   | 4.9604   |
| Debero-Mere et al [31]                                   | 2017 | 93559 | 3.5659 | 2.0195   | 6.2967   |
| Louwen et al [32]                                        | 2017 | 93194 | 3.2521 | 1.8984   | 5.5709   |
| Grupta et al [33]                                        | 2019 | 93761 | 3.2982 | 1.9445   | 5.5942   |
| Vinkenvleugel et al [34]                                 | 2020 | 92322 | 3.1199 | 1.8036   | 5.3969   |
| GLOBAL                                                   |      | 93943 | 3.1020 | 1.8316   | 5.2536   |
| <b>Sensitivity analysis of perinatal trauma</b>          |      |       |        |          |          |
| Babovic et al [20]                                       | 2010 | 70045 | 3.8718 | 2.3108   | 6.4871   |
| Singh et al [22]                                         | 2012 | 70336 | 3.8015 | 2.2541   | 6.4110   |
| Toivonen et al [23]                                      | 2012 | 69697 | 3.6137 | 2.1200   | 6.1599   |
| Vistad et al [24]                                        | 2013 | 69879 | 3.7849 | 2.2418   | 6.3900   |
| Vlemmix et al [9]                                        | 2014 | 12128 | 3.2750 | 1.7601   | 6.0939   |
| Foster et al [25]                                        | 2014 | 69682 | 3.4801 | 2.0229   | 5.9871   |
| Bavovic et al [26]                                       | 2016 | 70302 | 5.0013 | 3.4041   | 7.3481   |
| Bin et al [27]                                           | 2016 | 65251 | 3.1925 | 1.8218   | 5.5944   |
| Abdessalami et al [29]                                   | 2017 | 70138 | 3.6419 | 2.1371   | 6.2051   |
| Fonseca et al [30]                                       | 2017 | 69121 | 3.4099 | 1.9935   | 5.8327   |
| Louwen et al [32]                                        | 2017 | 69701 | 3.9741 | 2.3698   | 6.6645   |
| Grupta et al [33]                                        | 2019 | 70268 | 3.7509 | 2.1523   | 6.5369   |
| Vinkenvleugel et al [34]                                 | 2020 | 68828 | 3.2096 | 1.8109   | 5.6885   |
| GLOBAL                                                   |      | 70448 | 3.6415 | 2.1747   | 6.0979   |
| <b>Sensitivity analysis of the APGAR score at 5 min.</b> |      |       |        |          |          |
| Babovic et al [20]                                       | 2010 | 91379 | 4.0294 | 2.0857   | 7.7843   |
| Tharin et al [21]                                        | 2011 | 69977 | 3.8313 | 1.7663   | 8.3106   |
| Toivonen et al [23]                                      | 2012 | 91029 | 4.0814 | 2.1297   | 7.8217   |
| Vistad et al [24]                                        | 2013 | 91211 | 3.7754 | 1.9792   | 7.2014   |
| Vlemmix et al [9]                                        | 2014 | 33460 | 3.5707 | 1.6588   | 7.6863   |
| Foster et al [25]                                        | 2014 | 91014 | 4.0329 | 2.0749   | 7.8388   |
| Bavovic et al [26]                                       | 2016 | 91634 | 4.3028 | 2.2644   | 8.1763   |
| Bin et al [27]                                           | 2016 | 86583 | 3.6386 | 1.8265   | 7.2485   |

|                                                           |      |       |        |        |        |
|-----------------------------------------------------------|------|-------|--------|--------|--------|
| Abdessalami et al [29]                                    | 2017 | 91471 | 3.9153 | 2.0596 | 7.4429 |
| Fonseca et al [30]                                        | 2017 | 90453 | 3.5598 | 1.8697 | 6.7779 |
| Louwen et al [32]                                         | 2017 | 91033 | 4.7856 | 2.7101 | 8.4506 |
| Grupta et al [33]                                         | 2019 | 91600 | 4.2995 | 2.2622 | 8.1716 |
| Vinkenvleugel et al [34]                                  | 2020 | 90516 | 2.9922 | 1.6967 | 5.2769 |
| GLOBAL                                                    |      | 91780 | 3.8832 | 2.0778 | 7.2574 |
| <b>Sensitivity analysis of admittance to neonatal ICU</b> |      |       |        |        |        |
| Babovic et al [20]                                        | 2010 | 32045 | 2.0318 | 1.3768 | .9983  |
| Tharin et al [21]                                         | 2011 | 10940 | 2.2200 | 1.5988 | 3.0827 |
| Toivonen et al [23]                                       | 2012 | 31695 | 2.0041 | 1.3897 | 2.8902 |
| Vistad et al [24]                                         | 2013 | 31878 | 1.7870 | 1.2519 | 2.5508 |
| Foster et al [25]                                         | 2014 | 31680 | 1.9087 | 1.3166 | 2.7672 |
| Bin et al [27]                                            | 2016 | 27249 | 1.8780 | 1.2251 | 2.8788 |
| Abdessalami et al [29]                                    | 2017 | 32137 | 1.9661 | 1.3420 | 2.8806 |
| Fonseca et al [30]                                        | 2017 | 31119 | 2.0127 | 1.3899 | 2.9145 |
| Vinkenvleugel et al [34]                                  | 2020 | 30825 | 1.8212 | 1.3250 | 2.5034 |
| GLOBAL                                                    |      | 32446 | 1.8446 | 1.3675 | 2.7653 |

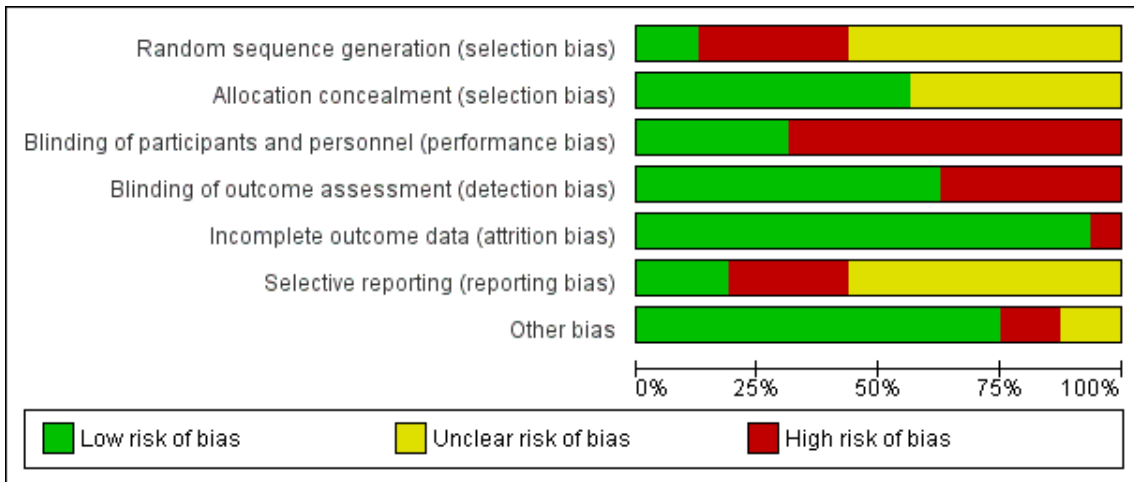

**Figure S1.** Publication bias analysis.

|                             | Random sequence generation (selection bias) | Allocation concealment (selection bias) | Blinding of participants and personnel (performance bias) | Blinding of outcome assessment (detection bias) | Incomplete outcome data (attrition bias) | Selective reporting (reporting bias) | Other bias |
|-----------------------------|---------------------------------------------|-----------------------------------------|-----------------------------------------------------------|-------------------------------------------------|------------------------------------------|--------------------------------------|------------|
| Abdessalami S, 2017         | ?                                           | ?                                       | +                                                         | +                                               | +                                        | ?                                    | +          |
| Babovic I et al, 2010       | ?                                           | ?                                       | +                                                         | +                                               | +                                        | ?                                    | +          |
| Bavovic I, 2016             | ?                                           | ?                                       | -                                                         | -                                               | +                                        | +                                    | ?          |
| Bin YS et al, 2016          | -                                           | +                                       | -                                                         | +                                               | +                                        | ?                                    | +          |
| Debero-Mere T, 2017         | ?                                           | ?                                       | -                                                         | -                                               | +                                        | +                                    | ?          |
| Fonseca A, 2017             | ?                                           | ?                                       | +                                                         | +                                               | +                                        | ?                                    | +          |
| Foster BA et al., 2014      | +                                           | +                                       | -                                                         | -                                               | -                                        | -                                    | +          |
| Grupta V, 2019              | -                                           | +                                       | -                                                         | +                                               | +                                        | ?                                    | +          |
| Högberg U, 2016             | ?                                           | +                                       | -                                                         | -                                               | +                                        | -                                    | -          |
| Louwen F et al, 2017        | -                                           | +                                       | -                                                         | +                                               | +                                        | ?                                    | +          |
| Singh A et al, 2012         | -                                           | +                                       | -                                                         | +                                               | +                                        | ?                                    | +          |
| Tharin HJE et al, 2011      | ?                                           | ?                                       | +                                                         | +                                               | +                                        | +                                    | +          |
| Toivonen E et al, 2012      | ?                                           | +                                       | -                                                         | -                                               | +                                        | -                                    | -          |
| Vinkenleugel DAM et al 2020 | -                                           | +                                       | -                                                         | +                                               | +                                        | ?                                    | +          |
| Vistad I et al, 2013        | +                                           | +                                       | -                                                         | -                                               | +                                        | -                                    | +          |
| Vlemmix F et al, 2014       | ?                                           | ?                                       | +                                                         | +                                               | +                                        | ?                                    | +          |

**Figure S2.** Summary of publication bias of the included studies.
